# Supplementary material
Source: PubMed Central journal article supplement (PMC3161615)
Supplement: 1104853108_pnas.201104853SI.pdf [file 1104853108_pnas.201104853SI.pdf]

# Supporting Information

Blackman et al. 10.1073/pnas.1104853108

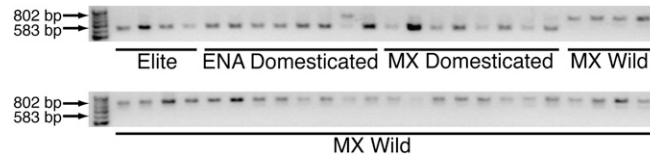

**Fig. S1.** Sample of restriction digest genotyping of *FLOWERING LOCUS T* homologue *HaFT1* PCR products. The frameshift mutation in the domesticated allele introduces a *BstEII* restriction site. No Mexican (MX) wild populations contained the frameshift, and their undigested PCR products ran at 802 bp. All improved, elite crop lines, all MX early domesticates, and all but one of the eastern North American (ENA) early domesticates included in this sample were homozygous for the domesticated allele (longer digestion product at 583 bp). One ENA early domesticate (seventh from left) shown is heterozygous for wild and domesticated alleles. All MX wild individuals were genotyped by restriction digest. All MX landrace genotypes were confirmed additionally by cloning and sequencing of PCR products.

**Table S1. American and Canadian diversity panel**

| Species                       | Type                                | GRIN ID   | Line name or population location |
|-------------------------------|-------------------------------------|-----------|----------------------------------|
| <i>Helianthus argophyllus</i> | Wild                                | PI 494571 | Corpus Christi, TX               |
|                               |                                     | PI 494572 | North Padre Island, TX           |
|                               |                                     | PI 494573 | Port Aransas, TX                 |
|                               |                                     | PI 494580 | Rachal, TX                       |
|                               |                                     | PI 494576 | Skidmore, TX                     |
|                               |                                     | PI 494582 | Victoria, TX                     |
|                               |                                     | PI 552943 |                                  |
| <i>Helianthus annuus</i>      | Improved                            | PI 599984 | RHA280                           |
|                               |                                     | PI 534655 | HA821                            |
|                               |                                     | PI 599768 | HA369                            |
|                               |                                     | PI 600000 | RHA801                           |
|                               |                                     | PI 552937 | RHA417                           |
|                               |                                     | PI 578872 | HA292                            |
|                               |                                     | PI 578873 | HA383                            |
|                               |                                     | PI 607505 | HA384                            |
|                               |                                     | PI 633744 | HA414                            |
|                               |                                     | PI 599773 | HA434                            |
|                               |                                     | PI 599759 | HA89                             |
|                               |                                     | PI 560141 | RHA274                           |
|                               | Domesticated                        | PI 560145 | RHA373                           |
|                               |                                     | PI 633746 | RHA377                           |
|                               |                                     | PI 633748 | RHA436                           |
|                               |                                     | PI 340790 | RHA438                           |
|                               |                                     | PI 650650 | USSR VNIIMK 8931 '66             |
|                               |                                     | PI 369357 | Ames7574, Mennonite              |
|                               |                                     | PI 369360 | Arikara                          |
|                               |                                     | PI 600717 | Seneca                           |
|                               |                                     | PI 600718 | Mandan #1                        |
|                               |                                     | PI 600719 | Mandan #2                        |
|                               |                                     | PI 600720 | Mandan #3                        |
|                               |                                     | PI 600721 | Hidatsa #1                       |
|                               |                                     | PI 432504 | Hidatsa #2                       |
|                               |                                     | PI 432505 | Hopi dye                         |
|                               |                                     | PI 432507 | Hopi                             |
|                               |                                     | PI 432508 | Hopi dye                         |
|                               |                                     | PI 432509 | Hopi dye                         |
| PI 369358                     | Havasupai                           |           |                                  |
| PI 369359                     | Hopi                                |           |                                  |
| PI 432510                     | Hopi dye, possible hybrid w/Mammoth |           |                                  |
| PI 432515                     | Zuni                                |           |                                  |
| PI 432516                     | Pueblo                              |           |                                  |

**Table S1. Cont.**

| Species | Type | GRIN ID   | Line name or population location            |
|---------|------|-----------|---------------------------------------------|
|         |      | PI 432521 | Anzac Pueblo                                |
|         |      | PI 432522 | Laguna Pueblo                               |
|         | Wild | PI 659440 | Ann1238, Cedar Point Biological Station, NE |
|         |      | PI 613750 | Dickinson, ND                               |
|         |      | PI 592325 | Carievale, Saskatchewan                     |
|         |      | PI 592316 | Keeler, Saskatchewan                        |
|         |      | PI 435434 | Riviera, TX                                 |
|         |      | PI 435619 | Tulsa, OK                                   |
|         |      | PI 494567 | Skidmore, TX, Ann1811                       |
|         |      | PI 468439 | Colfax, ND                                  |
|         |      | PI 586879 | Norden, NE                                  |
|         |      | PI 586872 | Axtell, NE                                  |
|         |      | PI 435616 | Topaz, MO                                   |
|         |      | PI 586869 | Silver Creek, NE                            |
|         |      | PI 586856 | Great Bend, KS                              |
|         |      | PI 586849 | Colby, KS                                   |
|         |      | PI 613751 | Minot, ND                                   |
|         |      | PI 613723 | Crete, ND                                   |
|         |      | PI 613722 | Onida, SD                                   |
|         |      | PI 613720 | Garden City, KS                             |
|         |      | PI 613711 | Woonsocket, SD                              |
|         |      | PI 592326 | Boissevain, Manitoba                        |
|         |      | PI 435505 | McLoud, OK                                  |
|         |      | PI 468475 | Childress, TX                               |
|         |      | PI 597890 | Yankton, SD                                 |

GRIN ID, US Department of Agriculture Germplasm Resources Information Network (<http://www.ars-grin.gov/npgs/>) identification number.

**Table S2. Mexican accessions used in this study**

| Type     | N         | Population ID number | Culture or line           | Location        | Latitude | Longitude  |
|----------|-----------|----------------------|---------------------------|-----------------|----------|------------|
| Landrace | 2         | 33655                | Tarahumara                | Chihuahua       | 26.84509 | -106.93494 |
|          | 2         | 34177                | Nahua                     | Guerrero        | 17.92778 | -99.52629  |
|          | 2         | 34111                | Nahua                     | Guerrero        | 17.92372 | -99.51938  |
|          | 2         | 34285                | Tzeltal                   | Chiapas         | 16.90928 | -92.09041  |
|          | 2         | 34055                | Nahua                     | Guerrero        | 17.92528 | -99.52958  |
|          | 2         | 34112                | Nahua                     | Guerrero        | 17.92372 | -99.51938  |
|          | 2         | 34282                | Tzeltal                   | Chiapas         | 16.90928 | -92.09041  |
|          | 1         | 34324                | Mixe                      | Oaxaca          | 16.9601  | -95.84218  |
|          | 2         | Ames 6859/PI 650646  | Maiz de Tejas             |                 |          |            |
|          | 2         | 34120                | Nahua                     | Guerrero        | 17.9248  | -99.33792  |
|          | 2         | 34110                | Nahua                     | Guerrero        | 17.92372 | -99.51938  |
|          | 2         | 34102                | Nahua                     | Guerrero        | 17.92098 | -99.52727  |
|          | 2         | 34109                | Nahua                     | Guerrero        | 17.92372 | -99.51938  |
|          | 2         | 33724                | Mennonite                 | Chihuahua       | 28.3095  | -106.10909 |
|          | 2         | 34107                | Nahua                     | Guerrero        | 17.9236  | -99.53328  |
|          | Wild      | 2                    | Ames 19070/PI 650761      | Maiz negro      |          |            |
| 9        |           | 28280                |                           | Tamaulipas      | 22.86712 | -99.10377  |
| 6        |           | 28321                |                           | Nuevo Leon      | 24.11155 | -99.82345  |
| 11       |           | 28353                |                           | Zacatecas       | 22.78198 | -103.5582  |
| 7        |           | 28315                |                           | San Luis Potosi | 22.30028 | -100.837   |
| 6        |           | 28339                |                           | Nuevo Leon      | 27.27295 | -100.18203 |
| 9        |           | 28395                |                           | Sinaloa         | 24.75317 | -107.49903 |
| 5        |           | 28392                |                           | Sinaloa         | 26.30297 | -109.03337 |
| 14       |           | 28376                |                           | Chihuahua       | 27.14178 | -104.92337 |
| 8        |           | 28307                |                           | Tamaulipas      | 23.00933 | -99.69512  |
| 8        |           | 28366                |                           | Zacatecas       | 24.71628 | -101.3117  |
| 12       |           | 28381                |                           | Chihuahua       | 28.57192 | -105.95682 |
| 10       |           | 28390                |                           | Sonora          | 27.5891  | -109.92963 |
| 7        |           | 28385                |                           | Sonora          | 30.20812 | -111.09735 |
| 4        | PI 413123 |                      | Mayo Experimental Station |                 |          |            |
| 4        | PI 413067 |                      | North of España           |                 |          |            |

Numbers with a "PI" (GRIN ID) were obtained from the US Department of Agriculture. Other accessions were collected by R.A.B. and D.L.L. from 2001 to 2005. All wild collections retrieved by R.A.B. and D.L.L. displayed the wild- type morphology with small heads, thin pedicels, and multiple flowering stalks per plant.

**Table S3. Distribution of diversity at 12 microsatellite loci in domesticated and wild *H. annuus* from eastern North America (ENA) and Mexico (MX)**

|                                      | ORS005                             | ORS008                             | ORS059 | ORS078                             | ORS176                             | ORS229                              | ORS297 | ORS337 | ORS398 | ORS399 | ORS534                              | ORS596 |
|--------------------------------------|------------------------------------|------------------------------------|--------|------------------------------------|------------------------------------|-------------------------------------|--------|--------|--------|--------|-------------------------------------|--------|
| Either/both wild only                | 16                                 | 6                                  | 23     | 2                                  | 16                                 | 6                                   | 15     | 8      | 30     | 15     | 20                                  | 8      |
| Both wild + either/both domesticated | 6<br><i>68.83/</i><br><i>88.00</i> | 7<br><i>99.67/</i><br><i>99.30</i> | 6      | 3<br><i>80.13/</i><br><i>59.59</i> | 7<br><i>88.22/</i><br><i>88.67</i> | 8<br><i>90.74/</i><br><i>100.00</i> | 7      | 11     | 9      | 5      | 10<br><i>99.39/</i><br><i>99.29</i> | 5      |
| ENA wild + both domesticated         | 1<br><i>17.59/</i><br><i>12.00</i> | 1<br><i>0.33/</i><br><i>0.70</i>   |        |                                    |                                    |                                     |        |        |        |        |                                     |        |
| ENA wild + ENA domesticated          | 2<br><i>13.58/</i><br><i>0.00</i>  |                                    |        |                                    |                                    | 1<br><i>9.26/</i><br><i>0.00</i>    |        |        |        |        | 1<br><i>0.61/</i><br><i>0.00</i>    |        |
| ENA wild + MX domesticated           |                                    |                                    |        |                                    |                                    |                                     |        |        |        |        |                                     |        |
| MX wild + both domesticated          |                                    |                                    |        |                                    |                                    |                                     |        |        |        |        |                                     |        |
| MX wild + ENA domesticated           |                                    |                                    |        |                                    |                                    |                                     |        |        |        |        |                                     |        |
| MX wild + MX domesticated            |                                    |                                    |        |                                    |                                    |                                     |        |        |        |        | 1<br><i>0.00/</i><br><i>0.71</i>    |        |
| Both domesticated only               |                                    |                                    |        | 1<br><i>19.87/</i><br><i>40.41</i> | 1<br><i>11.78/</i><br><i>11.33</i> |                                     |        |        |        |        |                                     |        |
| Total                                | 25                                 | 14                                 | 29     | 6                                  | 24                                 | 15                                  | 22     | 19     | 39     | 20     | 32                                  | 13     |

Numbers are allele counts per locus in each distribution class. Class allele frequencies for ENA domesticated/MX domesticated accessions are listed in italics for loci where alleles (i) were present only in domesticated accessions or (ii) were present in either ENA or MX domesticated but were found in in wild populations in only one region. The average sample sizes per locus were as follows: ENA wild, 233 individuals; MX wild, 190 individuals; ENA domesticated, 158 individuals; MX domesticated, 74 individuals.

**Table S4. Primers**

| Gene           | Direction             | Primer                                         |
|----------------|-----------------------|------------------------------------------------|
| <i>HaFT1</i>   | Forward*              | GATCCTGATGCTCCAGTCCAAGTGACCCTAA                |
|                | Reverse*              | GCCCTGGTGGAAATGATAGGAAA                        |
|                | Forward <sup>†</sup>  | AGAAACCCTTATCACCCAGACTCG                       |
|                | Reverse <sup>†</sup>  | CAAACAGTCTTTGTCGGGATCG                         |
| <i>HaGA2ox</i> | Forward*              | TGAGAGATGGAAGCTGGATGTCTG                       |
|                | Reverse* <sup>†</sup> | GTGCTTCACTCTTAGCAAAGGAAACAAC                   |
|                | Forward <sup>†</sup>  | CCACTATTCAACCGACGGGACTT                        |
|                | Forward* <sup>†</sup> | ACGSGTSAGGACAAGAACAA                           |
| <i>c4973</i>   | Reverse*              | ATGGCGCTTGTTTCAATGTCAGC                        |
|                | Reverse <sup>†</sup>  | GCCACTTTGTTCAAGTTTAGGG                         |
| <i>HaFT2</i>   | Forward               | ACATGTGGCCATCACAAGAGAAATAGTC                   |
|                | Reverse               | TATCTCCGTTGTCCACCAGATCCACTTTCACG               |
| <i>HaFT3</i>   | Forward               | TCTCCGTGTCCTATCATTGCC                          |
|                | Reverse               | CCAAGGTAGCAAGCGTTGAGCATT                       |
| ORS005         | Forward               | CACGACGTTGTA AAAACGACATGTGGAGCAGCAAATTCAG      |
|                | Reverse               | GTTTCTGCTGCCACCATACTG                          |
| ORS008         | Forward               | CACGACGTTGTA AAAACGACTTGGATCGATTGATGATTGTTG    |
|                | Reverse               | GTTTGAATCCGTCATGTATA AAAACGA                   |
| ORS059         | Forward               | CACGACGTTGTA AAAACGACGCTTCGTAGCTTTCTTCTTCGC    |
|                | Reverse               | GTTTAAGTAGCTTCGCAAGTATTCGG                     |
| ORS078         | Forward               | CACGACGTTGTA AAAACGACGTTTCGTGAGTACATGTTCTGC    |
|                | Reverse               | GTTTCCCTCGGAAAGTTGTCA                          |
| ORS176         | Forward               | CACGACGTTGTA AAAACGACCCCTAACTGGTTTTCTGACCC     |
|                | Reverse               | GTTTAACTTTTGTGTTGTTGTCCAGG                     |
| ORS229         | Forward               | CACGACGTTGTA AAAACGACTCCGACCCGAATCTTATGAACC    |
|                | Reverse               | GTTTGACCCGAATGAGACCCAAACTG                     |
| ORS297         | Forward               | CACGACGTTGTA AAAACGACTGCAAAGCTCACACTAACCTG     |
|                | Reverse               | GTTTGTGTCTGCACGAACTGTGGT                       |
| ORS337         | Forward               | CACGACGTTGTA AAAACGACTTGGTTTCATTTCCTTGGTC      |
|                | Reverse               | GTTTGGGTTGGTGGTTAATTCGTC                       |
| ORS398         | Forward               | CACGACGTTGTA AAAACGACCACGTCCTAAATTAAGTAGGAACGA |
|                | Reverse               | GTTTCCAAGACCTCCGTTGAGCTAT                      |
| ORS399         | Forward               | CACGACGTTGTA AAAACGACCGTACGGGTAGTTCTCATGGT     |
|                | Reverse               | GTTTGGATCACGTGGCGTTTATT                        |
| ORS534         | Forward               | CACGACGTTGTA AAAACGACTCCAAACTCTCTCCCTCT        |
|                | Reverse               | GTTTGCAGCGAAATAGGAAAAACG                       |
| ORS596         | Forward               | CACGACGTTGTA AAAACGACTGCGATTATTCTAGGAAGGTCA    |
|                | Reverse               | GTTTCATGAGGGCATTCTTGTCTT                       |

For a subset of individuals, nested PCR was conducted to amplify the target region. Microsatellite loci start with the prefix ORS. *c4973*, chorismate synthase homolog; *HaGA2ox*, gibberellin 2-oxidase homolog.

\*Primer used in first of two, nested PCR reactions.

<sup>†</sup>Primer used in second of two, nested PCR reactions.

**Table S5. GenBank accession numbers for deposited sequences**

| Gene                                                                                           | Samples                 | GenBank accession numbers              |
|------------------------------------------------------------------------------------------------|-------------------------|----------------------------------------|
| <i>HaGA2ox</i>                                                                                 | American/Canadian panel | JF428412–JF428543                      |
|                                                                                                | Mexican panel           | JF428388–JF428411<br>JF428544–JF428719 |
| <i>HaFT1</i>                                                                                   | American/Canadian panel | GQ884463–GQ884584                      |
|                                                                                                | Mexican panel           | JF428724–JF428779                      |
| <i>c4973</i>                                                                                   | Chapman 2008 panel      | FJ373761–FJ373782                      |
|                                                                                                | American landraces      | JF428180–JF428353                      |
|                                                                                                | Mexican panel           | JF428354–JF428387                      |
|                                                                                                | American/Canadian Panel | GQ884717 –GQ884848                     |
| PgiC (reference gene; homolog of phosphoglucose isomerase C)                                   | American/Canadian panel | GQ884849–GQ884980                      |
| <i>SCR1</i> (reference gene; homolog of <i>SCARECROW</i> )                                     | American/Canadian panel | GQ884988–GQ885119                      |
| <i>CGP41</i> (reference gene; homolog of <i>AVRPPHB SUSCEPTIBLE 1</i> )                        | American/Canadian panel | GQ884199–GQ884330                      |
| <i>CGP53</i> (reference gene; homolog of <i>ARABIDOPSIS THALIANA BASIC LEUCINE ZIPPER 11</i> ) |                         |                                        |
| <i>CGP62</i> (reference gene; homolog of <i>CYCLIC NUCLEOTIDE-GATED CHANNEL 15</i> )           | American/Canadian panel | HQ110110–HQ110241                      |
|                                                                                                |                         |                                        |
| <i>CGP69</i> (reference gene; homolog of <i>PURPLE ACID PHOSPHATASE 17</i> )                   | American/Canadian panel | HQ110242–HQ110373                      |
| <i>CGP112</i> (reference gene; homolog of <i>HUA1, ENHANCER OF AG-4 1</i> )                    | American/Canadian panel | HQ119174–HQ110505                      |
| <i>HaFT2</i>                                                                                   | Guerrero 34111          | JF428720J–F428721                      |
| <i>HaFT3</i>                                                                                   | Guerrero 34111          | JF428722–JF428723                      |
